# Supplementary material for: Association Between the Dietary Literacy of Children's Daily Diet Providers and School-age Children's Nutritional Status and Eating Behaviours: A Cross-sectional Study
Source: Research Square preprint supplement (doi:10.21203/rs.3.rs-1050128/v1), 2021-11-17

**A Letter to Parents**

Dear Parents:

Greetings! To implement the "Health China 2030" program and promote healthy physical and mental development of children, this study on dietary literacy of caregivers and school-age children's eating behaviors and physical development is conducted by Anhui Medical University School of Public Health with the support of the Danone Nutrition Foundation. Dietary behaviors, physical development and nutrition status of children are related to the dietary literacy of their caregivers. It is important to understand the influence of the dietary literacy of caregivers on the dietary behaviors, physical development and nutrition status of children. Therefore, we aim to investigate the association between dietary literacy of caregivers and the eating behavior of children, and physical development and nutrition status. Physical development was evaluated by measuring height, weight, and sebum thickness of children. Furthermore, we intend to collect 3-5 ml of peripheral venous blood to test hemoglobin and trace element (Zn, Ca, and Fe) levels to evaluate the n nutrition status. All examinations are free, and a paper report will be sent to you when completed.

We promise to treat your and your child's information in strict confidence.

If you agree to fill out the questionnaire and allow us to collect your child's biological sample, please sign the informed consent form. If you have any questions about this project, please contact Junjie Chang of Anhui Medical University.

Phone Number: 15955142658 E-mail: 3301836031@qq.com

School of Public Health, Anhui Medical University

November 10, 2018

**Feedbacks**

Child's name: ______ Child's birthday: ______ M/D/Y Gender: 口male 口female Phone number: ______

I understand the content of this survey and agree my child to participate in this program. (Please check with "√") 口Questionnaire completion 口Body measurements 口blood collection

Signature: ______ Relationship with the child:口 father口mother口other: ______

Date: ______

**致家长的一封信**

尊敬的家长：

您好！为了贯彻和落实“健康中国2030”纲要，科学地促进儿童身心健康发育，在达能营养基金支持下，安徽医科大学公共卫生学院开展了带养者膳食素养与学龄期儿童饮食行为与身体生长发育状况的研究。儿童饮食行为和生长发育与带养者的膳食素养有极大关系，了解带养者膳食素养对儿童饮食行为和生长发育的影响，对于培养孩子养成良好的饮食行为和健康成长具有重要意义。因此本研究旨在通过科学地调查分析，调查儿童带养者的膳食素养和儿童饮食行为，同时，测量儿童身高、体重和皮脂厚度，同时需采血3-5ml外周静脉血（检查血红蛋白和微量元素含量），用于评价儿童的生长发育状况。本项目所有检查费用由项目组承担，所有检查结果将以纸质报告的形式反馈给您。

我们承诺对您和孩子的信息严格保密。

如果您同意填写问卷和留取孩子的生物样本，请填写下面回执。如果您对此项目有任何疑问，请和安徽医科大学常俊杰进行联系，电话：15955142658 邮箱：[3301836031@qq.com](mailto:3301836031@qq.com)。

谢谢您的配合！

安徽医科大学公共卫生学院

2018年11月10日

**回执**

儿童姓名：

儿童生日：_______年_______月_______日； 性别：口男， 口女

有效的联系电话：

口我了解了此项调查的内容，我同意我的孩子参加这个项目的全部检查。（请在相应处打" √ "）

🗌问卷填写； 🗌身体测量； 🗌取血。

父母／监护人签字：

与孩子的关系：🗌父亲，🗌母亲， 其他______

填写日期：


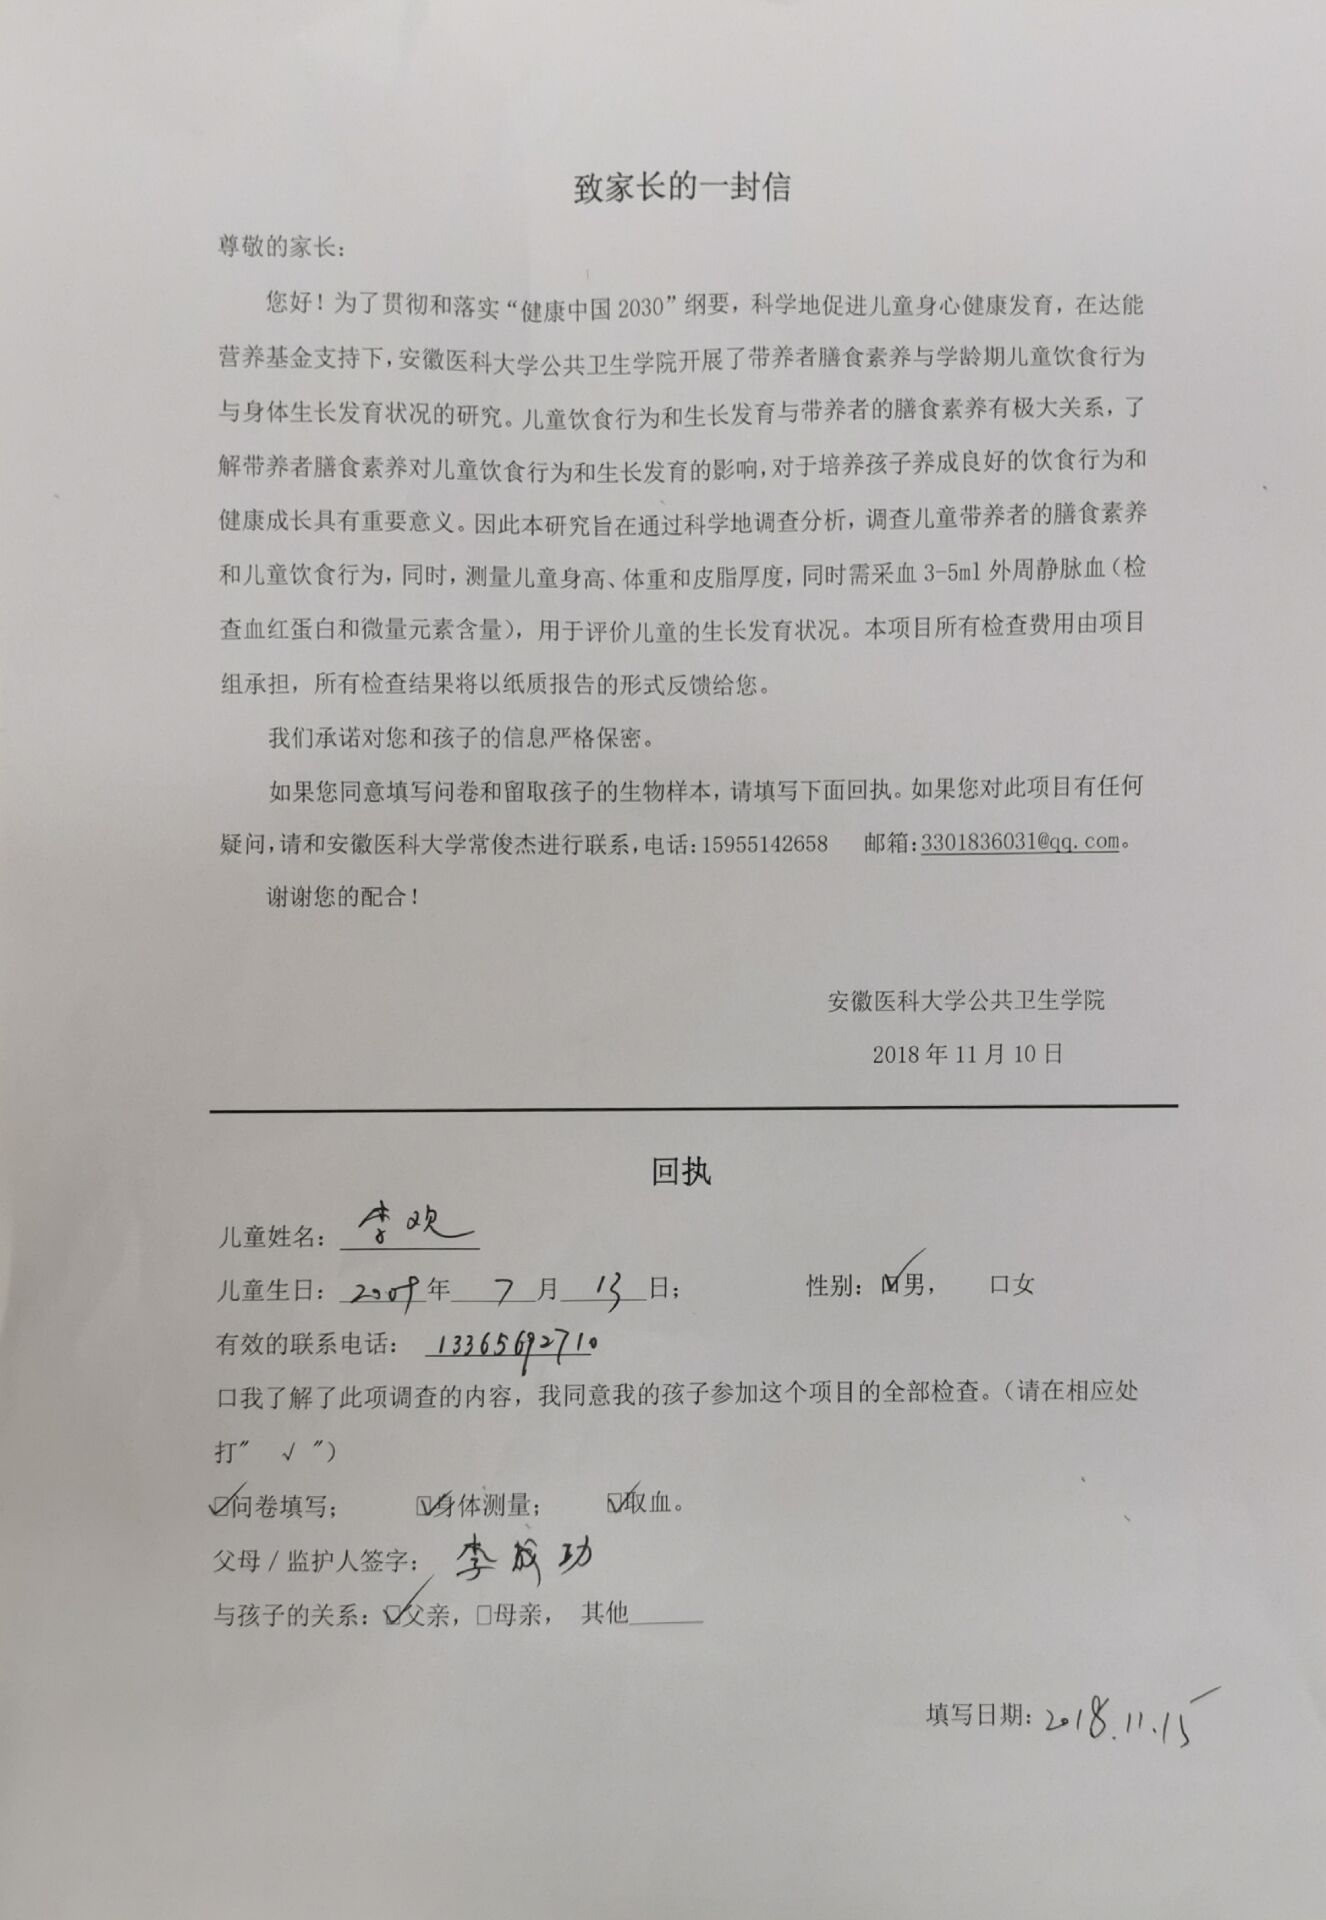

Supplement: Supplementary file 2 [file 7ad3ca13553984805dd09397.docx]
